# Supplementary material for: Large-area, highly oriented lamellar block copolymer nanopatterning directed by graphoepitaxially assembled cylinder nanopatterns
Source: Royal Society of Chemistry journal article supplement (doi:10.1039/c2jm15842f), 2012-01-01
Supplement: c2jm15842f.pdf [file c2jm15842f.pdf]

Supplementary Material (ESI) for Journal of Materials Chemistry  
This journal is © The Royal Society of Chemistry 2012

## Supplementary Information

# Large-Area, Highly Oriented Lamellar Block Copolymer Nanopatterning Directed by Graphoepitaxially Assembled Cylinder Nanopatterns

Hyoung-Seok Moon,<sup>a</sup> Dong Ok Shin,<sup>a</sup> Bong Hoon Kim,<sup>a</sup> Hyeong Min Jin,<sup>a</sup> Sumi Lee,<sup>b</sup>  
Moon Gyu Lee,<sup>b</sup> and Sang Ouk Kim<sup>a\*</sup>

<sup>a</sup>Department of Materials Science and Engineering, KAIST,  
Daejeon, 305-701, Republic of Korea

<sup>b</sup> LCD R&D Center, Samsung Electronics,  
446-920 446-711 95 Samsung2-Ro, Kihung-Gu, Yung-In city,  
Kyungki-Do, 446-920, Republic of Korea

e-mail: [sangouk.kim@kaist.ac.kr](mailto:sangouk.kim@kaist.ac.kr)

Supplementary Material (ESI) for Journal of Materials Chemistry  
This journal is © The Royal Society of Chemistry 2012

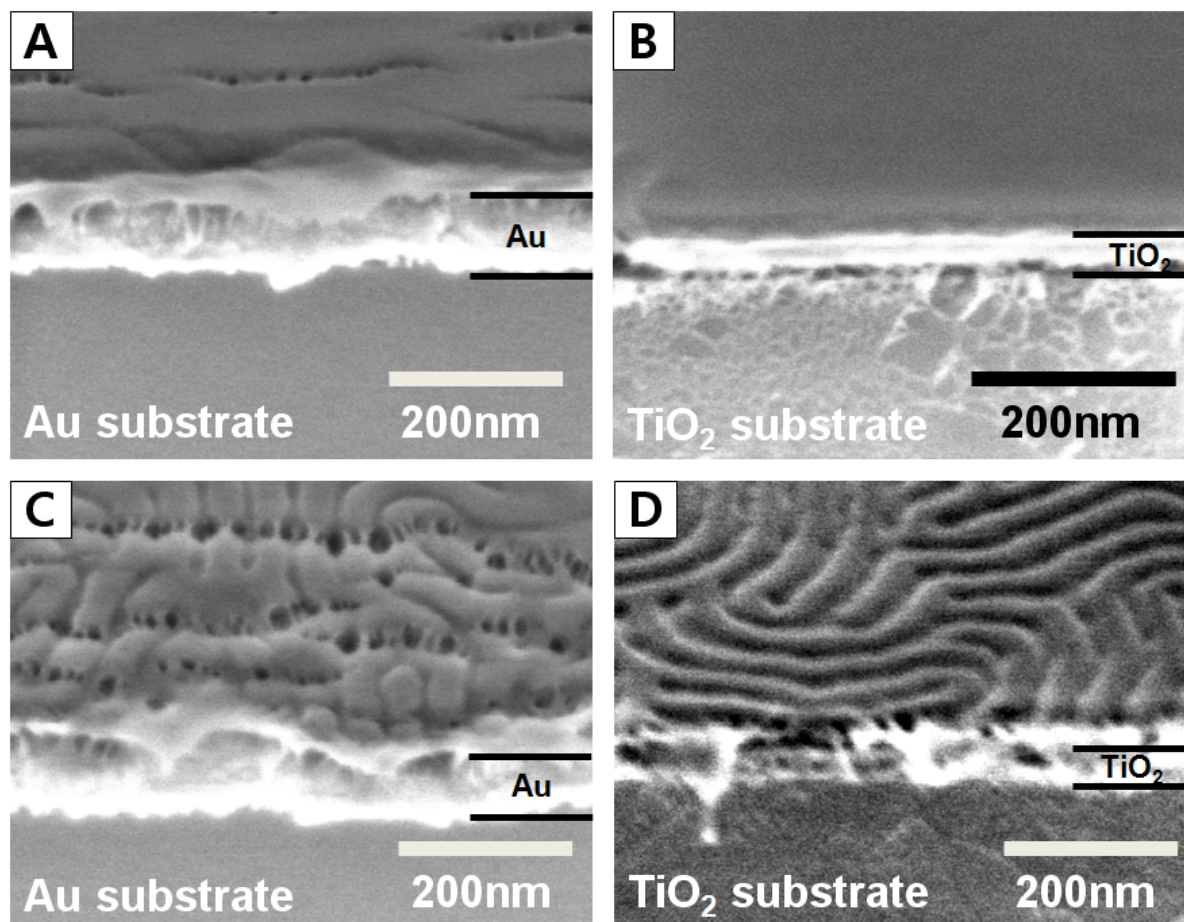

**Figure S1.** Crosssectional SEM image of parallel self-assembled lamellae on bare (a) Au film and (b) TiO<sub>2</sub> film, and perpendicular self-assembled lamellae on the parallel cylinder block copolymer layer deposited on (c) Au film and (d) TiO<sub>2</sub> film, respectively.
